1 **Title:** Time dependent proinflammatory responses shape virus interference during coinfections of influenza A  
2 virus and influenza D virus

3

4 **Running title:** Virus interference during IAV and IDV coinfection

5

6 Minhui Guan<sup>1,2,3¶</sup>, Sherry Blackmon<sup>4¶</sup>, Alicia K. Olivier<sup>5</sup>, Xiaojian Zhang<sup>1,2,3</sup>, Liyuan Liu<sup>4</sup>, Amelia Woolums<sup>5</sup>,

7 Mark A. Crenshaw<sup>6</sup>, Shengfa F. Liao<sup>6</sup>, Richard Webby<sup>7</sup>, William Epperson<sup>5</sup>, and Xiu-Feng Wan<sup>1,2,3,4,8\*</sup>

8

9 <sup>1</sup>MU Center for Influenza and Emerging Infectious Diseases, University of Missouri, Columbia, Missouri, United  
10 States of America

11 <sup>2</sup>Department of Molecular Microbiology and Immunology, School of Medicine, University of Missouri, Columbia,  
12 Missouri, United States of America

13 <sup>3</sup>Bond Life Sciences Center, University of Missouri, Columbia, Missouri, United States of America

14 <sup>4</sup>Department of Basic Sciences, College of Veterinary Medicine, Mississippi State University, Mississippi, United  
15 States of America

16 <sup>5</sup>Department of Pathobiology and Population Medicine, College of Veterinary Medicine, Mississippi State  
17 University, Mississippi, United States of America

18 <sup>6</sup>Department of Animal and Dairy Sciences, Mississippi State University, Mississippi State, Mississippi, United  
19 States of America

20 <sup>7</sup>Department of Infectious Diseases, St. Jude Children's Research Hospital, Memphis, Tennessee, United States of  
21 America

22 <sup>8</sup>Department of Electrical Engineering & Computer Science, College of Engineering, University of Missouri,  
23 Columbia, Missouri, United States of America

24

25 \*Corresponding author: Dr. Xiu-Feng Wan by [w anx@missouri.edu](mailto:w anx@missouri.edu).

26

27 <sup>¶</sup>Contributed equally to this study. Author order was determined by a mutual agreement and in order of increasing  
28 seniority.

29

30

31 **Abstract**

32 Both influenza A virus (IAV) and influenza D virus (IDV) are enzootic in pigs. IAV causes  
33 approximately 100% morbidity with low mortality, whereas IDV leads to only mild respiratory diseases in pigs.  
34 In this study, we performed a series of coinfection experiments *in vitro* and *in vivo* to understand how IAV and  
35 IDV interact and cause pathogenesis during coinfection. Results showed that IAV inhibited IDV replication when  
36 infecting swine tracheal epithelial cells (STEC) with IAV 24- or 48- hours prior to IDV inoculation, and that IDV  
37 suppressed IAV replication when IDV preceded IAV inoculation by 48 hours. Virus interference was not  
38 identified during simultaneous IAV/IDV infections or with 6 hours between the two viral infections, regardless of  
39 their order. The interference pattern at 24- and 48-hours correlated with proinflammatory responses induced by  
40 the first infection, which was about 24-hours slower for IDV than IAV. The viruses did not interfere with each  
41 other if both infected the cells before proinflammatory responses were induced. Coinfection in pigs further  
42 demonstrated that IAV interfered both viral shedding and virus replication of IDV, especially in the upper  
43 respiratory tract. Clinically, coinfection of IDV and IAV did not show significant enhancement of disease  
44 pathogenesis, compared with the pigs infected with IAV alone. In summary, this study suggests that interference  
45 during coinfection of IAV and IDV is primarily due to the proinflammatory response and is therefore dependent  
46 on the time between infection, and the order of infection.

47 **Importance**

48 Both IAV and IDV are enzootic in pigs, and feral pigs have a higher risk for both IAV and IDV exposures  
49 than IDV exposure alone. This study suggests that in coinfection with IAV and IDV either virus can interfere with  
50 the replication of the other virus by stimulating proinflammatory responses; however, the proinflammatory  
51 response was 24 hours slower for IDV than IAV. *In vitro* there was no interference during simultaneous  
52 coinfection, regardless of infection order. Coinfection of IDV and IAV in pigs did not show enhanced  
53 pathogenesis, compared with those infected only with IAV. This study can facilitate our understanding of virus  
54 epidemiology and pathogenesis associated with IAV and IDV coinfection.

55

## 56 **Introduction**

57           Influenza viruses are classified into types A, B, C and D according to genetic and antigenic properties of  
58 the nucleoprotein (NP) and matrix 1 (M1) genes (1, 2). Whereas influenza B and C viruses are documented to  
59 infect only humans and swine, influenza A virus (IAV) and influenza D virus (IDV) can infect a wide range of  
60 hosts. In addition to humans, IAV can infect pigs, horses, dogs, marine mammals (e.g. seals and whales), and a  
61 spectrum of avian species, including both wild birds and domestic poultry; IDV can infect domestic and feral  
62 swine, cattle, goats, sheep, camelids, buffalo, and equids (2-8), and a low level of human exposure to IDV is also  
63 documented (9). The influenza genome consists of negative-sense, single-stranded, segmented RNA. The  
64 genome of IAV contains eight segments, encoding at least 10 or even 14 proteins (10), whereas those of IDV  
65 contain seven segments, encoding at least nine proteins. Based upon the surface glycoproteins, hemagglutinin  
66 (HA) and neuraminidase (NA), IAV is further classified into 18 HA and 11 NA types (11, 12). Different from  
67 IAV, IDV encodes a hemagglutinin-esterase-fusion (HEF) surface glycoprotein that catalyzes receptor binding,  
68 cleavage, and membrane fusion (3, 13, 14), resembling the functions of HA and NA for IAV.

69           IAV can stimulate both innate and adaptive immune responses with variations that are host dependent.  
70 IAV induces the host innate immune response and promotes disease pathogenesis through non-structural (NS1)  
71 protein to inhibit TRIM25 ubiquitination, which is required for the activation of retinoic acid-inducible gene I  
72 (RIG-I) mediated interferon production (15). The RIG- I pathway, essential in epithelial cell interferon induction,  
73 is induced by preferentially binding viral RNA with a greater affinity for single-stranded RNA without 5'OH or  
74 5'-methylguanosine cap (16). Presence of RIG-I in ducks (but not in chickens) induces proinflammatory responses  
75 and ultimately facilitates viral clearance in ducks during IAV infection (17). In humans, modulating the innate  
76 immune response via interferon inhibition often enhances virus production. However, in some cases the interferon  
77 response is too robust which may lead to a “cytokine storm” characterized by overproduction of interferon leading  
78 to upregulation of additional proinflammatory cytokines, excessive infiltration of the tissue by immune cells  
79 leading to tissue destruction. The cytokine storm was reported for the 1918 pandemic H1N1 virus (18) and H5N1  
80 highly pathogenic avian influenza virus (19-22).

81 IDV infection in IDV seronegative calves cause mild pathogenicity in cattle (23), with mild respiratory  
82 disease with respiratory tract inflammation characterized by multifocal mild tracheal epithelial attenuation and  
83 neutrophil infiltration. In field studies, IDV has been associated with bovine respiratory disease (BRD) complex, a  
84 disease of significant economic burden. A previous study had no evidence of cattle coinfecting with IDV and  
85 *Mannheimia haemolytica*, a pathogen commonly detected in BRD, to have worse clinical scores or lung  
86 pathology than animals infected with only *Mannheimia haemolytica* (24). In animal models, IDV replicated in the  
87 upper and lower respiratory tracts of pigs (3, 25), guinea pigs (26) and mice (27), and the overall clinical diseases  
88 in these animal models caused by a single IDV infection were mild. Nevertheless, the overall role of IDV in  
89 pathogenesis, especially during coinfections with other pathogens, including IAV, is still unclear.

90 Both IAV and IDV are documented to be enzootic in pigs, based on serological evidence from a set of  
91 feral swine sera samples collected in the U.S. from 2010–2013 where approximately 43%, were seropositive for  
92 IDV and IAV, suggesting the host-pathogen ecology may include coinfections (25). In addition, the  
93 seroprevalence rate of IDV in IAV-seropositive feral swine was more than twice that observed among IAV-  
94 negative feral swine, suggesting the possibility of virus interactions during IAV and IDV coinfection (25). The  
95 objectives of this study were to evaluate the interactions between IAV and IDV during coinfection and to evaluate  
96 the pathogenesis during IAV-IDV coinfection in influenza seronegative pigs. By using an *in vitro* system, we  
97 compared proinflammatory responses of IAV and IDV and further correlated these responses with the virus  
98 interference patterns and with the factors of infection order and infection time gap. Additionally, we evaluated  
99 clinical pathogenesis of IAV and IDV coinfection using a pig model.

100

## 101 **Results**

102 **Both IAV and IDV stimulate proinflammatory responses but in a different speed.** To compare  
103 proinflammatory responses stimulated by IAV and IDV, we evaluated both gene and protein expression in swine  
104 tracheal epithelial primary cells (STEC), which was kindly provided by Dr. Stacey Schultz-Cherry, for a set of  
105 proinflammatory markers, including type I interferon (IFN- $\beta$ ), type II interferon (IFN-  $\gamma$ ), tumor necrosis factor  
106 alpha (TNF- $\alpha$ ), DDX58 (retinoic acid-inducible gene I [RIG-I]), interleukin (IL)-1 $\beta$ , IL-4, IL-6, IL8, IL-10, IP-10

107 (also called CXCL10, interferon- $\gamma$ -inducible protein 10, previously called IP-10), C-C chemokine ligand 5  
108 (CCL5), and C-X-C Motif Chemokine Ligand 9 (CXCL9)] (Table 1), which were reported in IAV and/or IDV  
109 infection (28, 29). In all *in vitro* experiments, A/swine/Texas/A01104013/2012(H3N2) (sH3N2) and  
110 D/bovine/Mississippi/C00046N/2014 (D/46N) were used, and multiplicity of infection (MOI) of 0.001 and 0.1  
111 were implemented for IAV and IDV, respectively.

112 For IAV infection, results from quantitative RT-PCR (qRT-PCR) showed that, compared with those in  
113 the negative control, the IP-10 and CXCL9 had the fastest and highest responses, with  $9.92 (\pm 0.03; \text{standard}$   
114  $\text{deviation})$ - and  $5.89 (\pm 0.87)$  -fold increases at 24 hours post inoculation (hpi) and with  $516.78 (\pm 110.48)$ - and  
115  $768.59 (\pm 330.43)$ -fold increases at 48 hpi, respectively. Gene expression of TNF- $\alpha$ , CCL5 and DDX58 were  
116 significantly increased at 48 hpi ( $12.86 \pm 1.57$ ;  $20.18 \pm 2.19$ ;  $28.84 \pm 3.33$ , respectively) and remained elevated at  
117 72 hpi whereas IFN- $\beta$  and IL-6 increased at 48 hpi ( $15.49 \pm 4.21$ ;  $2.87 \pm 1.19$ , respectively) but rapidly decreased  
118 at 72 hpi. Gene expression of IFN-  $\gamma$ , IL-4, IL-8, IL-10, and IL-1 $\beta$  were not significantly changed (Fig 1).

119 For IDV infection, none of the proinflammatory markers we evaluated showed upregulated gene  
120 expression at 24 hpi. Similar to the IAV infection, the expression of six genes significantly started to increase at  
121 48 hpi (IP-10,  $62.20 \pm 60.88$ ; CXCL9,  $83.68 \pm 85.79$ ; TNF- $\alpha$ ,  $7.78 \pm 4.99$ ; IFN- $\beta$ ,  $3.79 \pm 2.50$ ; CCL5,  $12.32 \pm$   
122  $10.76$ ; DDX58,  $4.24 \pm 1.86$ ) and remained elevated at 72 hpi (Fig 1). Among them, IP-10 and CXCL9 has the  
123 highest upregulated expression. Gene expression of IFN-  $\gamma$ , IL-4, IL-6, IL-8, IL-10, and IL-1 $\beta$  was not  
124 significantly affected.

125 To further validate the proinflammatory responses at the protein level, we quantified IFN- $\beta$  in cell  
126 supernatants harvested at 24 and 48 hpi by ELISA assay. Results showed that IFN- $\beta$  was upregulated with  $6.61$   
127  $(\pm 1.05)$ - and  $2.02 (\pm 0.18)$ - folds for IAV and IDV infections at 48 hpi, respectively, both of which correlate to  
128 increased mRNA expression.

129 In summary, both IAV and IDV stimulated similar proinflammatory responses, including IP-10, CXCL9,  
130 TNF- $\alpha$ , CCL5, DDX58, CXCL9, and IFN- $\beta$  with a similar level of upregulation; however, the proinflammatory  
131 responses by IAV appeared approximately 24 hours earlier than IDV.

132

133 **IAV and IDV interfere the replication of each other during coinfection.** We hypothesize that proinflammatory  
134 responses stimulated by IAV and IDV interfere with virus replication during coinfection, and thus interference  
135 will be dependent on the order and time gap of virus infection. To test this hypothesis, we performed a series of  
136 coinfection experiments in STECs by 1) simultaneous inoculation of IAV and IDV (A+D) ; 2) sequential  
137 inoculations with IAV followed by IDV (A-D groups) with time gaps of 6 (A-D-6h), 24 (A-D-24h) and 48 hours  
138 (A-D-48h), and 3) sequential inoculations with IDV followed by IAV (D-A groups) with time gaps of 6 hours (D-  
139 A-6h), 24 (D-A-24h) and 48 hours (D-A-48h). The infection groups of IAV (A-mock) or IDV (D-mock) alone  
140 were included as mock controls. The viral copies of IAV and IDV were quantified using IAV and IDV matrix-  
141 gene (M) specific qRT-PCR.

142 IAV reached titers of 2.99 ( $\pm$  0.38), 5.00 ( $\pm$  0.26), and 5.67 ( $\pm$  0.27)  $\log_{10}$  copies/ $\mu$ l at 24, 48, and 72 hpi  
143 in A-mock, respectively; correspondingly, IDV had 4.68 ( $\pm$  0.26), 5.11 ( $\pm$  0.22), and 5.19 ( $\pm$  0.21)  $\log_{10}$  copies/ $\mu$ l  
144 in D-mock. In the A+D group, IAV and IDV reached the growth plateau with a titer of 5.01 ( $\pm$  0.27) and 5.03 ( $\pm$   
145 0.22)  $\log_{10}$  copies/ $\mu$ l at 48 hpi, respectively. Both the titers of either IAV or IDV in A+D were not statistically  
146 significant different from those corresponding titers in A-mock ( $p$  = 0.842) or D-mock ( $p$  >0.9999) (Fig 2A).

147 For the A-D sequential infection groups, at 48 hpi, IDV had 5.72 ( $\pm$  0.22), 4.87 ( $\pm$  0.21), and 2.80 ( $\pm$  0.22)  
148  $\log_{10}$  copies/ $\mu$ l in A-D-6h, A-D-24h, and A-D-48h, respectively. Compared with those at the A-mock group, there  
149 were a 1.08 ( $\pm$  0.12)-fold change at A-D-6h, a 7.61 ( $\pm$ 0.29)-fold decrease at A-D-24h, and a 882.42 ( $\pm$ 16.61)-fold  
150 decrease at A-D-48h. Statistical analyses showed that the IDV titers were significantly lower in A-D-24h ( $p$  =  
151 0.0204) and A-D-48h ( $p$  < 0.0001) than in D-mock, but no significant difference was identified between A-D-6h  
152 and D-mock ( $p$  > 0.9999) (Fig 2B). The titers of IAV in all three A-D groups were not statistically different from  
153 those of A-mock.

154 For the D-A sequential infection groups, at 48 hpi, the IAV had 6.05 ( $\pm$  0.24), 5.62 ( $\pm$  0.23), and 3.34 ( $\pm$   
155 0.25)  $\log_{10}$  copies/ $\mu$ l in D-A-6h, D-A-24h, and D-A-48h, respectively. Compared with those at the A-mock group,  
156 there was a 590.44 ( $\pm$  12.39)-fold decrease in the viral titers of IAV at 48 hpi in the D-A-48h groups. Statistical  
157 analyses showed that the IAV titers were significantly lower in D-A-48h ( $p$  < 0.0001) but not affected in D-A-6h

158 ( $p > 0.9999$ ) or D-A-24h ( $p = 0.056$ ) (Fig 2C). The titers of IDV in the A-D groups were not statistically different  
159 from those from the D-mock group.

160 Taken together, our results suggest that IAV inhibited IDV replication in STEC when IAV preceded IDV  
161 inoculation by 24 or more hours. IDV inhibited IAV replication when IDV preceded IDA inoculation by 48 hours.  
162 The viral interference correlated with the speed of the proinflammatory responses induced by the first infection,  
163 which was about 24-hours slower for IDV than IAV, and the viruses did not interfere when cells were coinfecting  
164 simultaneously, before proinflammatory responses were induced, validating our hypotheses.

165

166 **Coinfection of IAV and IDV in pigs limited replication of IDV but not IAV in upper respiratory tracts.** To  
167 evaluate the pathogenesis during coinfection of IAV and IDV, we simultaneously intranasally inoculated pigs  
168 with  $10^6$  TCID<sub>50</sub>/ml of sH3N2 and the same amount of D/46N, both of which resulted in effective virus  
169 replication and shedding in pigs (25, 30). Single infection groups (A-mock [n = 5] or D-mock [n = 7]) and a  
170 control group inoculated with sterile PBS (Negative group; n = 6) were included as controls.

171 Results showed in the single infections, 5/5 pigs shed IAV and 6/7 pigs shed IDV at 3, 4 and/or 5 dpi,  
172 respectively. In A-mock, viral shedding peaked at 3 dpi ( $6.10 \log_{10}$  copies/ml); whereas, virus shedding in D-mock  
173 peaked at 5 dpi ( $4.72 \log_{10}$  copies/ml). In the coinfection group A+D, 7/7 shed IAV which peaked at 3 dpi ( $5.33$   
174  $\log_{10}$  copies/ml), but only 1/7 pigs shed IDV, which peaked at 4 dpi with low viral copies ( $3.95 \log_{10}$  copies/ml).  
175 To evaluate how coinfection affects viral shedding, we compared viral shedding between A-mock and A+D and  
176 found that the IAV shedding showed no significant difference during the five days ( $p = 0.1262$ ). Of interest, pigs  
177 in the coinfection A+D group showed significantly decreased shedding of IDV, compared to D-mock ( $p < 0.0001$ )  
178 (Fig 3).

179 To further evaluate the coinfection on tissue dependent viral replication, all pigs were euthanized on 5 dpi  
180 and the viral load in the tissues of the respiratory tree were quantified. The fourteen respiratory tract tissues were  
181 categorized into four groups: 1) turbinate [rostral (RT), middle (MT), ethmoid turbinate (ET)], 2) trachea [upper  
182 (TR-U), middle (TR-M), distal (TR-D)], 3) soft palate (SP), and 4) lower respiratory tract [bronchus (BR), lung  
183 left cranial (LCR) and caudal (LCD), and right cranial (RCR), caudal (RCD), middle (RM) and accessory (RA)]



184 lobes]. In tissues from both A-mock and A+D, all pigs were positive for IAV with a detection limit of 4.03 log<sub>10</sub>  
185 copies/g. There was no significant difference between A-mock and A+D for respiratory tissue IAV replication ( $p$   
186 = 0.8214) (Fig 4A).

187 All pigs in the groups D-mock and A+D were positive for IDV. IDV copy number was lowest in the  
188 lower respiratory tract at 4.46 and 4.25 log<sub>10</sub> copies/g, for single and coinfection groups, respectively. In the single  
189 infection IDV group, IDV copy number was the highest in the turbinate average at 6.96 log<sub>10</sub> copies/g and less in  
190 the trachea at 4.84 log<sub>10</sub> copies/g ( $p < 0.001$ ) and lower respiratory tract at 4.46 log<sub>10</sub> copies/g ( $p < 0.001$ ).  
191 Differences were also significantly different between the soft palate (6.23 log<sub>10</sub> copies/g) and lower respiratory  
192 tract (4.46 log<sub>10</sub> copies/g) ( $p < 0.001$ ) and trachea (4.84 log<sub>10</sub> copies/g) ( $p = 0.001$ ). In A+D, IDV copy number  
193 was higher in the trachea (5.27 log<sub>10</sub> copies/g) than in the lower respiratory tract (4.25 log<sub>10</sub> copies/g) ( $p = 0.032$ ).  
194 There were no other differences among tissues in the coinfection group A+D ( $p > 0.137$ ). IDV copy number was  
195 lower in the RT, MT, and SP in A+D than D-mock. Specifically, there were significant differences between the  
196 RTs with 4.59 vs 7.38 log<sub>10</sub> copies/g ( $p < 0.0001$ ), MTs with 5.51 vs 7.97 log<sub>10</sub> copies/g ( $p < 0.0001$ ) and the SPs  
197 with 4.45 vs 6.23 log<sub>10</sub> copies/g ( $p = 0.0018$ ) for A+D and D-mock, respectively. The trachea and lower  
198 respiratory tract showed no differences in IDV viral copy number when comparing D-mock and A+D (all  $p >$   
199 0.05) (Fig 4B).

200 Taken together, simultaneous co-inoculation of IAV and IDV in pigs significantly reduced viral shedding  
201 of IDV and viral replication of IDV in the tissues of the upper respiratory tract, but coinfection did not affect  
202 replication of IAV.

203

204 **Coinfection of IAV and IDV virus did not significantly enhance disease pathogenesis.** Pigs in all virally  
205 inoculated groups had elevated body temperatures (A-mock, D-mock, and A+D) and lymphopenia. At 3 and 4 dpi,  
206 rectal temperatures were slightly higher in the single infection groups than the coinfection group; however, there  
207 was no statistical difference due to a large variation across pigs in the negative control group. Histologic  
208 evaluation of all tissues from the respiratory tract showed no significant differences between treatment groups.  
209 This is largely due to chronic inflammatory changes being present in the turbinate, trachea and lung. There was

210 no significant acute inflammatory response in any of the tissues. Chronic tracheal inflammation was  
211 characterized by mucosal and submucosal infiltrates of lymphocytes, plasma cells and fewer eosinophils (Fig 5).  
212 In some sections of trachea apoptotic cells were frequent, but not significantly different between treatment groups  
213 (5D). In all lung sections, including control tissues, the interstitium was moderately thickened due to increased  
214 numbers of interstitial macrophages, eosinophils, and fewer lymphocytes. There was no evidence of bronchiolar  
215 epithelial loss or exudate within the lumen of the airways. The chronic inflammatory changes are thought to be  
216 due to the environmental housing and chronic antigenic stimulation.

217 IAV and influenza B virus, like other viral pathogens, induce apoptosis *in vitro* and *in vivo*, and apoptosis  
218 is associated pathogenesis of influenza viruses (31, 32). Cleaved caspase-3 (CC3) is a downstream effector  
219 caspase and an important regulator of apoptosis, activation of Caspase 3 is shown to be essential for efficient  
220 influenza virus propagation (33). To further examine apoptosis associated pathogenesis among the virally infected  
221 groups, we determined examined and semi-quantified CC3 via immunohistochemistry in the tracheal tissues. In  
222 the A-mock group, the mean number of CC3 positive cells was 93 ( $\pm$  22 SEM; range: 47-174) which was higher  
223 than mean number of CC3 positive cells in the control group 19 ( $\pm$  3 SEM; range 12-27) ( $p \leq 0.05$ ) (Fig 5E). In the  
224 D-mock group, the mean number of CC3 positive cells was 96 ( $\pm$  41 SEM; range: 15-248). Of note, in the D-  
225 mock group, four pigs had low numbers of CC3 positive cells, but the counts were high for pigs 61 and 71.  
226 Interestingly, pig 71 was the only pig in the D-mock group that was positive for all respiratory tract tissues  
227 sampled. In the A+D group, the mean was 50 ( $\pm$  12 SEM; range: 19-99). Nevertheless, no statistical significances  
228 were found for the number of CC3 positive cells among A-mock, D-mock, and A+D groups.

229 Taken together, the coinfection did not lead to significant differences in the clinical signs or pathology  
230 compared to single infection.

231

## 232 Discussion

233 The objectives of this study were to evaluate the interactions between IAV and IDV during coinfection,  
234 and to evaluate the pathogenesis during coinfection in influenza seronegative pigs. Our *in vitro* data showed that  
235 proinflammatory responses were stimulated by IDV at 48 hpi was 24 hours delayed compared to proinflammatory

236 responses by IAV, although the expression levels and the associated genes were similar between IAV and IDV  
237 infections. Therefore, interference by IAV and IDV depends on both infection order and infection time gap, with  
238 no interference observed with simultaneous infection in STEC. In addition to STEC, experiments were also  
239 performed in MDCK cells, and the results were similar to those observed in STEC (data not shown). An animal  
240 challenge with IAV and IDV coinfection showed IDV nasal shedding and viral replication in nasal turbinate and  
241 soft palate were decreased during coinfection, suggesting simultaneous coinfection may have antagonistic effects  
242 on IDV viral replication *in vivo*. By examining viral shedding, we found that pigs infected with sH3N2 shed  
243 viruses at 2 dpi and peaked at 3 dpi whereas those infected D/46 shed virus at 3 dpi and peaked at 5 dpi. Thus, we  
244 speculate that the fast replication of IAV in pigs may have rapidly stimulated proinflammatory responses in the  
245 upper respiratory tracts and consequently inhibited the replication of IDV in pigs. Of interest, interference of IAV  
246 on IDV was not observed in the tissues of the middle or lower respiratory tracts, perhaps due to slower  
247 proinflammatory responses of IAVs within the lower respiratory tract, compared with those at the upper  
248 respiratory tracts. Future studies will include the collection of swine bronchoalveolar lavage fluid to evaluate the  
249 proinflammatory responses during different days of coinfection. Nevertheless, our data support that virus-virus  
250 interactions during coinfection are complicated and likely affected by multiple factors such as the time lag  
251 between coinfecting viruses and rate of virus replication (reviewed in (34)).

252 Virus-virus interaction, via incredibly diverse mechanisms, are broadly classified by three outcomes:  
253 interference, enhancement, or accommodation (34, 35), and these interactions can be groups into 15 mechanisms  
254 with three main categories, direct interactions between the viruses, indirect interactions that result from alterations  
255 in the host environment, and immunological interactions (reviewed by DePalma *et al.* (35)]. The most frequently  
256 observed interaction is interference, or when replication of one virus prevents or inhibits multiplication of the  
257 other. Viral interference has also been defined as a state of temporary immunity from infection induced by viral  
258 infection (36), and the most common mechanism of viral interference is interferon mediated. One virus triggers  
259 the host interferon response that nonspecifically blocks replication of the other virus. Time of exposure and viral  
260 replication are critical factors. On the other hand, viruses may also compete for receptor binding or replication  
261 sites, metabolites, or other host supports, and this competition can occur between closely related or unrelated

262 viruses. Our results suggested that the interactions between IAV and IDV were associated with the  
263 proinflammatory responses by either virus, or the inhibitory interference were shown to be bi-directional. Our  
264 study also showed that IAV and IDV did not interfere each other if both viruses were inoculated within a certain  
265 time frame, e.g., 24 hours when IAV inoculation followed by IDV inoculation or 48 hours when IDV inoculation  
266 followed by IAV inoculation. As described before, such time gaps are more likely associated with the speed of  
267 virus replication as well as the proinflammatory responses induced by the first virus.

268         Several prior studies detail IAV stimulated proinflammatory responses in humans, various animal models  
269 and in various cells (29). For example, in newborn pig trachea cells, subtype H3N2 swine IAV activated  
270 JAK/STAT and MAPK signaling pathways and stimulated the upregulation of RIG-I, IFN- $\beta$ , IFN- $\lambda$ 1, Mx1, OAS1,  
271 PKR, IL6, and SOCS1 (37). On the other hand, lung tissues from the mice infected with IDV had minor  
272 proinflammatory responses for TLR7, CCL5, IRF3, IL-6, IL-1 $\beta$ , IFN- $\gamma$  at 1 dpi (27), of which, CCL5 had the  
273 highest responses. Of interest, although IAV can lead much higher morbidity in pigs than IDV, our *in vitro* study  
274 using STEC showed both viruses can induce a similar level of proinflammatory responses with the same set of  
275 genes, including IP-10, CCL5, CXCL9, TNF- $\alpha$ , and IFN- $\beta$ . Several markers evaluated, IL-4, IL-6, IL-8, IL-10,  
276 and IL-1 $\beta$ , had minimal or limited expression. These results indicate IDV and IAV may share similar signaling  
277 pathways, such as JAK/STAT and MAPK, during proinflammatory immune responses.

278         Apoptosis, or programmed cell death in the absence of inflammation, is an energy-dependent, caspase-  
279 mediated biochemical mechanism characterized morphologically by cytoplasmic and nuclear condensation,  
280 chromatin cleavage, apoptotic bodies, maintenance of an intact plasma membrane, and exposure of surface  
281 molecules targeting phagocytosis and efficient removal of the cell and its contents (38-41). Activation of CC3 is  
282 shown to be essential for efficient influenza virus propagation (33). The induction of apoptosis and subsequent  
283 phagocytosis of infected cells is also one of antiviral mechanisms (42, 43). In this study, we evaluated the CC3  
284 expression in trachea which showed that the average number of CC3 positive cells were higher in the trachea from  
285 the pigs from all pig treatment groups than those from the negative control pig, indicating virus caused apoptosis  
286 in the infected pigs (Fig. 5E). On the other hand, no statistical significance was found among A-mock, D-mock

287 and A+D groups. The results support that coinfection pigs did not have increased pathogenesis than either IAV or  
288 IDV single infection pigs.

289 One limitation of this study is that only a single dose for each virus was used both *in vitro* and *in vivo*  
290 experiments. Additional experiments need to further evaluate alternative doses for inoculation, which may affect  
291 the interference patterns between two viruses. In addition, in the pig experiment, we only performed simultaneous  
292 coinfection in the pig model, and the primary proinflammatory cytokines were not determined. Future directions  
293 could feasibly test a sequential infection time course in the pig model, and the tissue dependent primary  
294 proinflammatory cytokines aid in further understanding of the tissue dependent virus interference in pigs.

295 In summary, this study suggests that both IAV and IDV can interfere with the replication of each other by  
296 stimulating proinflammatory responses; however, the proinflammatory response was 24 hours slower for IDV  
297 than IAV. The mechanism of viral interference appears to be via proinflammatory responses and not through viral  
298 binding or replication. Coinfection of IDV and IAV in pigs did not show enhanced pathogenesis, compared with  
299 those infected only with IAV. This study facilitates our understanding of virus epidemiology and pathogenesis  
300 associated with IAV and IDV coinfection.

301

## 302 **Materials and methods**

303 **Viruses and Cells.** Animals were infected with D/bovine/C00046N/Mississippi/2014 (abbreviated as D/46N)  
304 and/or A/swine/Texas/A01104013/2012 (H3N2) (abbreviated as sH3N2) isolated from feral swine. D/46N was  
305 isolated from sick cattle in Mississippi (44) and propagated in human rectal tumor cells (HRT-18G) (American  
306 Type Culture Collection, Manassas, VA), whereas sH3N2 was isolated from feral swine (45) and propagated in  
307 MDCK cells (American Type Culture Collection, Manassas, VA). Viruses were propagated in Opti-MEM I  
308 Reduced Serum Medium (Thermo Fisher Scientific, Asheville, NC) supplemented with 1 µg/ml of TPCK-trypsin  
309 (Gibco, New York) at 37°C under 5% CO<sub>2</sub>. The predominant exposure for swine in the U.S. is the IAV H3  
310 subtype and strains circulating in feral and domestic swine are antigenically and genetically similar (45-48).  
311 Because pathogenicity is strain, dose and route dependent, we used swine IAV and IDV stains previously shown  
312 by our laboratory to produce successful infection in pigs at 10<sup>6</sup> TCID<sub>50</sub>/ml by intranasal inoculation (25, 49).

313

314 **Growth kinetics *in vitro*.** To determine the replication consequences of the coinfection in cell lines, STEC in 6-  
315 well plates were infected with viruses at a multiplicity of infection of 0.001 for IAV and 0.1 for IDV, respectively,  
316 based on our pilot study. For the four groups of single infection, after absorption for 1 hour at 37°C, the cells were  
317 washed with PBS and incubated for 96 hours at 37°C in 5% CO<sub>2</sub> with Opti-MEM I Reduced Serum Medium  
318 (Thermo Fisher Scientific, Waltham, MA) supplemented with 1 µg/ml TPCCK treated Trypsin from bovine  
319 pancreas (Sigma-Aldrich, St. Louis, MO) and with 100 U/ml Gibco penicillin-streptomycin (Thermo Fisher  
320 Scientific, Waltham, MA). For the multiple-infection groups, supernatants were removed, washed with PBS, and  
321 re-infected again at designated hours (6h, 24h and 48h) after first infection. Supernatants were collected at 24, 48,  
322 72 and 96 hours after infection. The RNA copies of each samples were determined with qRT-PCR. STEC of 24-,  
323 48- and 72-hours post infection were washed, harvested and subjected to total RNA extraction and mRNA  
324 expression analyses of cytokines and chemokines.

325

326 **Quantification of cytokine and chemokine expression.** RNeasy Mini Kit (QIAGEN, Germantown, MD) was  
327 used to extract total RNA from infected cells following the manufacturing manual. Total cellular RNA of 1µg was  
328 transcribed to cDNA using SuperScript™ III Reverse Transcriptase (Thermo Fisher Scientific, Waltham, MA)  
329 with Oligo(dT)20 Primer (Thermo Fisher Scientific, Waltham, MA, USA). The cDNA was used in qPCR using  
330 PowerUp™ SYBR® Green Master Mix (Thermo Fisher Scientific, Waltham, MA) and designed primers for  
331 specific targets (Table 1). The qPCR amplification mixture contains: 7µl of water, 10µl of PowerUp™ SYBR®  
332 Green Master Mix, 1µl of each forward- and reverse- primers (10 µM), 1µl of cDNA. The parameters of the qPCR  
333 were as follows: one cycle at 50°C for 2 minutes, one cycle at 95°C for 2 minutes, followed by 40 cycles at 95°C  
334 for 1 seconds, 60°C for 30 seconds. Gene expression data were normalized by house-keeping gene (β-actin). We  
335 used the  $2^{-\Delta\Delta Ct}$  (Ct is the cycle threshold) methods for qPCR data analysis. Here,  $\Delta\Delta Ct$  represents:  $\Delta Ct$  (sample)  
336 ( $[Ct_{\text{gene of interest}} - Ct_{\text{housekeeping gene}}]$  of infected cells) -  $\Delta Ct$  (Mock) ( $[Ct_{\text{gene of interest}} - Ct_{\text{housekeeping gene}}]$  of uninfected  
337 cells). The mean fold change ( $2^{-\Delta\Delta Ct}$ ) values of triplicates and standard deviation were represented. Porcine IFN-β

338 ELISA Kit (Abcam, Cambridge, MA) was used to quantify the protein expression of IFN- $\beta$  in supernatants from  
339 STEC infection following the manufacturing manual.

340

341 **Viral RNA extraction.** The supernatant from homogenized tissue and the transport media containing the nasal  
342 swabs were used for RNA extraction. Viral RNA was extracted using the MagMAX Pathogen RNA/DNA Kit (#  
343 4462359) with KingFisher™ Flex Purification System (Thermo Fisher Scientific, Waltham, MA) following the  
344 manufacturer's high-throughput purification protocol. Extracted RNA was stored at -80°C until qRT-PCR could  
345 be performed.

346

347 **Virus quantification.** To quantify viral copy number in nasal swabs and tissues, qRT-PCR was performed using  
348 standard protocols, primers, and probe validated by the CDC for IAV (50) and in-house designed primers and  
349 probe to detect IDV (below). Briefly, qRT-PCR was performed in triplicate by using TaqMan Fast Virus 1-step  
350 Master Mix (Life Technology, Carlsbad, CA) following the manufacturer's protocol and using 2  $\mu$ l of RNA  
351 template. Samples were amplified using IAV CDC primer and probe set InfA: Forward 5'-  
352 GACCRATCCTGTACCTCTGAC-3'; Reverse 5'-AGGGCATTYTGACAAA CGTCTA-3'; and Probe 5'-  
353 [FAM]-TGCAGTCCTCGCTCA CTGGGCACG-[BHQ]-3'. To detect IDV primer and probe set Forward 5'-  
354 ACGCAATGGCACAAGAAC-3'; Reverse 5'-ACCACTATGCTCTCTCCAC-3'; and Probe 5'-[FAM]-  
355 AGGAGTTAACCCAATGACCAGGCAAACGA-[BHQ]-3' was used. The fast mode amplification protocol was  
356 followed: reverse transcription (1 cycle at 50°C for 5 min), inactivation (1 cycle at 95°C for 20 sec), followed by  
357 40 alternating cycles of denaturation at 95°C for 3 sec and annealing and extension at 60°C for 1 min.

358 Viral copies in samples were determined with the standard curve generated by the plasmid containing the target  
359 gene segment (IAV M plasmid or IDV M plasmid) cloned into a dual-promoter plasmid vector, pHW2000, as  
360 previously described (51, 52). The IDV M plasmid was generously provided by Dr. Richard Webby (St. Jude  
361 Children's Research Hospital, Memphis, TN). The standard curves were plotted by Ct values against viral copy  
362 number/ml (nasal swabs) or viral copy number/g (tissue homogenate). Mean Ct values of biological triplicates

363 were recorded, and viral copy number concentrations were calculated based on the standard curve constructed  
364 across a series of known target concentrations of plasmid. The data were presented in figures as log<sub>10</sub> (viral copy  
365 number concentration) form.

366

367 **Animal study.** Animal experiments were conducted under BSL-2 conditions in compliance with protocols  
368 approved by the Institutional Animal Care and Use Committee of Mississippi State University. Twenty-five pigs  
369 (Large White x Landrace) aged 116-120 days with a mean weight of 43 kg (range 24-62 kg) were provided by the  
370 Mississippi State University Department of Animal and Dairy Sciences (MSU-ADS). The pigs farrowed at MSU-  
371 ADS were unvaccinated and biosecurity protocols were in place to limit contact with other animals and personnel  
372 with self-reported clinical symptoms of respiratory infection as well other animals. All pigs were housed together  
373 prior to the study. At - 8 dpi and repeated at 0 dpi, all pigs were confirmed serologically negative by HI assay  
374 against the challenge viruses and other representative influenza viruses. These viruses were chosen to represent  
375 the antigenic strains in the vaccine used to vaccinate the sows (Flusure XP® Zoetis, USA) at 84 days gestation as  
376 well as seasonal human influenza strains. The pigs tested seronegative against the following viruses: D/46N  
377 (challenge virus), sH3N2 (challenge virus), A/swine/Ohio/09SW96/2009 (H3N2),  
378 A/swine/Indiana/13TOSU1154/2013 (H1N1), A/swine/Iowa/15/2013 (H1N1), and human viruses A/Hong  
379 Kong/4801/2014 (H3N2) and A/California/04/2009 (H1N1).

380 At 5 days prior to inoculation all pigs were transferred to BSL-2 facilities and assigned by ear tag number  
381 to one of four treatment rooms (12 x 12 feet with negative air flow) as indicated below. Although all pigs were  
382 116-120 days old, their weight range was variable, so they were first stratified in groups of four of similar weights  
383 and then randomly assigned to one of four infection treatment groups: A-mock group (sH3N2) (n=5), D-mock  
384 group (D/46N) (n=7), IAV + IDV group (coinfection) (n=7) or negative group (sterile PBS) (n=6). Investigators  
385 and animal care personnel were not blinded to treatment groups and workflow was control, IDV, IAV and  
386 coinfection Pigs were intranasally infected as follows: A-mock group received 10<sup>6</sup> TCID<sub>50</sub>/ml of sH3N2 in a  
387 volume of 1 ml administered in approximately equal doses to the right and left nostril by syringe; D-mock group  
388 received 10<sup>6</sup> TCID<sub>50</sub>/ml of D/46N using the same method as above; A+D group received 10<sup>6</sup> TCID<sub>50</sub>/ml of sH3N2



389 and  $10^6$  TCID<sub>50</sub>/ml of D/46N using the same method as above; and negative group received sterile PBS using the  
390 same method as above. Because pathogenicity is strain, dose and route dependent, we used swine IAV and IDV  
391 stains previously shown by our laboratory to produce successful infection in pigs at a smaller dose ( $10^6$   
392 TCID<sub>50</sub>/ml) and by intranasal inoculation (25, 49). IAV H3 subtype is the predominant influenza virus exposure in  
393 feral and domestic swine (46-48) and intranasal inoculation simulates a more natural route of infection (53).

394 During the study, clinical signs, rectal temperatures, and nasal swabs were taken daily and whole blood  
395 collected at 0, 3 and 5 dpi. At 5 dpi all pigs were euthanized, nasal swabs and blood were collected immediately  
396 prior to the euthanasia. Pigs were necropsied and respiratory tract tissues were collected including: rostral, middle  
397 and ethmoid sections of nasal turbinate; soft palate; upper, middle and distal sections of trachea; bronchus; and  
398 one section from each lung lobe (left cranial, left caudal, right cranial, right middle, right accessory and right  
399 caudal). Tissues were fixed in 10% buffered formalin and additional sets were frozen at -80°C.

400

401 **Clinical Data.** To assess clinical signs of influenza infection, prior to entering the enclosure, pigs were observed  
402 from a window for changes in attitude, elevated respiratory rate, cough, dyspnea, nasal or ocular discharge or  
403 conjunctivitis. Rectal temperatures were obtained for all pigs beginning three days prior to inoculation (-3 dpi)  
404 and daily through day 5 of the study (5 dpi). Nasal swabs were collected daily (0-5 dpi) using sterile cotton tipped  
405 applicators and transported in sterile PBS supplemented with PenStrep (1:100 w/v) on ice to the BSL-2 laboratory  
406 where they were aliquoted and stored at -80°C. Blood samples were taken at 0, 3 and 5 dpi and stored at 4°C until  
407 a complete blood count (CBC) could be performed by the MSU-CVM Diagnostic Lab. A CBC for each pig was  
408 obtained with exception of blood samples that were clotted prior to processing. The samples included one pig  
409 from the negative group at 0 dpi, one pig from the D-mock group at 0 dpi, one pig from A+D group at 3 dpi and at  
410 5dpi and one pig from the A-mock group at 5dpi.

411 Respiratory tract tissues were collected at necropsy and frozen at -80°C until homogenization. Tissues  
412 were thawed on ice and a sterile #10 blade and forceps were used to cut and then weigh 1 gram of tissue. Tissue  
413 samples were placed into prechilled 7 ml autoclaved tubes with prefilled ceramic beads (KT03961-1-302.7, Bertin  
414 Instruments, Rockville, MD) and 4 ml of prechilled PBS supplemented with PenStrep (1:100 w/v). Tissues were

415 homogenized at 8000 x rpm for 20 seconds for 4 cycles (Precellys® Evolution Homogenizer, Bertin Instruments,  
416 Rockville, MD). Sample heating was prevented by incubating the tubes on ice between homogenization cycles.  
417 Samples were centrifuged at 15871 x g (Eppendorf ® 5424, Eppendorf North America, Hauppauge, NY) for 5  
418 minutes to pellet debris and the supernatant aliquots stored at -80°C until RNA extraction and qRT-PCR could be  
419 performed.

420

421 **Histopathological examination.** Respiratory tract tissues were fixed in 10% buffered formalin, paraffin  
422 embedded, sectioned at 5µm sections and stained with hematoxylin and eosin (H&E) for histopathological  
423 examination.

424

425 **Caspase-3 stain and quantification.** Tracheal sections cut at 5µm on charged slides. Slides were stained with  
426 anti-cleaved caspase-3 (Asp175) antibody (Cell Signaling Technology, Catalog #9661) at a 1:200 dilution  
427 following the manufacturer's protocol for IHC paraffin-embedded tissues. The tissue sections were evaluated at  
428 20X to determine the area with the most abundant staining, and then positive cells from 20 consecutive high  
429 powered fields (40X) were counted. The average number of CC3 positive staining cells from the upper, middle  
430 and distal trachea were recorded and analyzed.

431

432 **Statistical analyses.** One-way analysis of variance (ANOVA) with repeated measures was used to compare the  
433 growth kinetics in cells, with Bonferroni adjustment for multiple comparisons (GraphPad Prism version 8.3.1,  
434 GraphPad Software, San Diego, CA). Two-way ANOVA was conducted for the animal study with a replication  
435 comparison between the single infection groups and co-infection group followed by Bonferroni multiple  
436 comparisons (GraphPad Prism version 8.3.1, GraphPad Software, San Diego, CA). The CC3 data were log<sub>10</sub>-  
437 transformed and subjected to the Shapiro–Wilk's test of normality and Brown-Forsythe test for homogeneity of  
438 variance. A One-way ANOVA followed by Tukey's multiple-comparisons test was performed. Differences were  
439 considered significant when  $p \leq 0.05$ .

440

441 **Acknowledgments**

442 We thank Dr. Stacey Schultz-Cherry for kindly providing swine tracheal epithelial primary cells (STEC) and  
443 Kaitlyn Waters and Hui Wang for their help with the animal experiments. We also thank the Mississippi State  
444 University College of Veterinary Medicine's laboratory animal resources and care to support our animal  
445 experiments.

446

447 **References**

448

- 449 1. Palese P, Shaw M. 2007. Orthomyxoviridae: the viruses and their replication, p 1647–1690. *In* Knipe D,  
450 Howley P (ed), *Fields virology*, 5 ed, vol 2. Lippincott Williams & Wilkins, Philadelphia, PA.
- 451 2. Hause BM, Collin EA, Liu R, Huang B, Sheng Z, Lu W, Wang D, Nelson EA, Li F. 2014.  
452 Characterization of a novel influenza virus in cattle and Swine: proposal for a new genus in the  
453 Orthomyxoviridae family. *mBio* 5:e00031-14.
- 454 3. Hause BM, Ducatez M, Collin EA, Ran Z, Liu R, Sheng Z, Armien A, Kaplan B, Chakravarty S, Hoppe  
455 AD, Webby RJ, Simonson RR, Li F. 2013. Isolation of a novel swine influenza virus from Oklahoma in  
456 2011 which is distantly related to human influenza C viruses. *PLoS Pathog* 9:e1003176.
- 457 4. Ferguson L, Eckard L, Epperson WB, Long LP, Smith D, Huston C, Genova S, Webby R, Wan X-F.  
458 2015. Influenza D virus infection in Mississippi beef cattle. *Virology* 486:28-34.
- 459 5. Quast M, Sreenivasan C, Sexton G, Nedland H, Singrey A, Fawcett L, Miller G, Lauer D, Voss S,  
460 Pollock S, Cunha CW, Christopher-Hennings J, Nelson E, Li F. 2015. Serological evidence for the  
461 presence of influenza D virus in small ruminants. *Vet Microbiol* 180:281-5.
- 462 6. Salem E, Cook EAJ, Lbacha HA, Oliva J, Awoume F, Aplogan GL, Hymann EC, Muloi D, Deem SL,  
463 Alali S, Zouagui Z, Fevre EM, Meyer G, Ducatez MF. 2017. Serologic Evidence for Influenza C and D  
464 Virus among Ruminants and Camelids, Africa, 1991-2015. *Emerg Infect Dis* 23:1556-1559.
- 465 7. Zhai SL, Zhang H, Chen SN, Zhou X, Lin T, Liu R, Lv DH, Wen XH, Wei WK, Wang D, Li F. 2017.  
466 Influenza D Virus in Animal Species in Guangdong Province, Southern China. *Emerg Infect Dis*  
467 23:1392-1396.
- 468 8. Nedland H, Wollman J, Sreenivasan C, Quast M, Singrey A, Fawcett L, Christopher-Hennings J, Nelson  
469 E, Kaushik RS, Wang D, Li F. 2018. Serological evidence for the co-circulation of two lineages of  
470 influenza D viruses in equine populations of the Midwest United States. *Zoonoses Public Health* 65:e148-  
471 e154.

- 472 9. Eckard LE. 2016. Assessment of the Zoonotic Potential of a Novel Bovine Influenza Virus. Ph.D.  
473 University of Tennessee Health Science Center.
- 474 10. Einfeld AJ, Neumann G, Kawaoka Y. 2015. At the centre: influenza A virus ribonucleoproteins. *Nat Rev*  
475 *Microbiol* 13:28-41.
- 476 11. Tong S, Li Y, Rivaller P, Conrardy C, Castillo DA, Chen LM, Recuenco S, Ellison JA, Davis CT, York  
477 IA, Turmelle AS, Moran D, Rogers S, Shi M, Tao Y, Weil MR, Tang K, Rowe LA, Sammons S, Xu X,  
478 Frace M, Lindblade KA, Cox NJ, Anderson LJ, Rupprecht CE, Donis RO. 2012. A distinct lineage of  
479 influenza A virus from bats. *Proceedings of the National Academy of Sciences of the United States of*  
480 *America* 109:4269-74.
- 481 12. Tong S, Zhu X, Li Y, Shi M, Zhang J, Bourgeois M, Yang H, Chen X, Recuenco S, Gomez J, Chen LM,  
482 Johnson A, Tao Y, Dreyfus C, Yu W, McBride R, Carney PJ, Gilbert AT, Chang J, Guo Z, Davis CT,  
483 Paulson JC, Stevens J, Rupprecht CE, Holmes EC, Wilson IA, Donis RO. 2013. New world bats harbor  
484 diverse influenza A viruses. *PLoS Pathog* 9:e1003657.
- 485 13. Rosenthal PB, Zhang X, Formanowski F, Fitz W, Wong CH, Meier-Ewert H, Skehel JJ, Wiley DC. 1998.  
486 Structure of the haemagglutinin-esterase-fusion glycoprotein of influenza C virus. *Nature* 396:92-6.
- 487 14. Herrler G, Klenk HD. 1991. Structure and function of the HEF glycoprotein of influenza C virus. *Adv*  
488 *Virus Res* 40:213-34.
- 489 15. Gack MU, Albrecht RA, Urano T, Inn KS, Huang IC, Carnero E, Farzan M, Inoue S, Jung JU, Garcia-  
490 Sastre A. 2009. Influenza A virus NS1 targets the ubiquitin ligase TRIM25 to evade recognition by the  
491 host viral RNA sensor RIG-I. *Cell Host Microbe* 5:439-49.
- 492 16. Loo YM, Gale M, Jr. 2011. Immune signaling by RIG-I-like receptors. *Immunity* 34:680-92.
- 493 17. Barber MR, Aldridge JR, Jr., Webster RG, Magor KE. 2010. Association of RIG-I with innate immunity  
494 of ducks to influenza. *Proc Natl Acad Sci U S A* 107:5913-8.
- 495 18. Kash JC, Tumpey TM, Proll SC, Carter V, Perwitasari O, Thomas MJ, Basler CF, Palese P, Taubenberger  
496 JK, Garcia-Sastre A, Swayne DE, Katze MG. 2006. Genomic analysis of increased host immune and cell  
497 death responses induced by 1918 influenza virus. *Nature* 443:578-81.

- 498 19. de Jong MD, Simmons CP, Thanh TT, Hien VM, Smith GJ, Chau TN, Hoang DM, Chau NV, Khanh TH,  
499 Dong VC, Qui PT, Cam BV, Ha do Q, Guan Y, Peiris JS, Chinh NT, Hien TT, Farrar J. 2006. Fatal  
500 outcome of human influenza A (H5N1) is associated with high viral load and hypercytokinemia. *Nat Med*  
501 12:1203-7.
- 502 20. Peiris JS, Yu WC, Leung CW, Cheung CY, Ng WF, Nicholls JM, Ng TK, Chan KH, Lai ST, Lim WL,  
503 Yuen KY, Guan Y. 2004. Re-emergence of fatal human influenza A subtype H5N1 disease. *Lancet*  
504 363:617-9.
- 505 21. To KF, Chan PK, Chan KF, Lee WK, Lam WY, Wong KF, Tang NL, Tsang DN, Sung RY, Buckley TA,  
506 Tam JS, Cheng AF. 2001. Pathology of fatal human infection associated with avian influenza A H5N1  
507 virus. *J Med Virol* 63:242-6.
- 508 22. Yuen KY, Chan PK, Peiris M, Tsang DN, Que TL, Shortridge KF, Cheung PT, To WK, Ho ET, Sung R,  
509 Cheng AF. 1998. Clinical features and rapid viral diagnosis of human disease associated with avian  
510 influenza A H5N1 virus. *Lancet* 351:467-71.
- 511 23. Ferguson L, Olivier AK, Genova S, Epperson WB, Smith DR, Schneider L, Barton K, McCuan K,  
512 Webby RJ, Wan XF. 2016. Pathogenesis of Influenza D Virus in Cattle. *J Virol* 90:5636-5642.
- 513 24. Zhang X, Outlaw C, Olivier AK, Woolums A, Epperson W, Wan XF. 2019. Pathogenesis of co-infections  
514 of influenza D virus and *Mannheimia haemolytica* in cattle. *Vet Microbiol* 231:246-253.
- 515 25. Ferguson L, Luo K, Olivier AK, Cunningham FL, Blackmon S, Hanson-Dorr K, Sun H, Baroch J,  
516 Lutman MW, Quade B, Epperson W, Webby R, DeLiberto TJ, Wan XF. 2018. Influenza D Virus  
517 Infection in Feral Swine Populations, United States. *Emerg Infect Dis* 24:1020-1028.
- 518 26. Sreenivasan C, Thomas M, Sheng Z, Hause BM, Collin EA, Knudsen DEB, Pillatzki A, Nelson E, Wang  
519 D, Kaushik RS, Li F. 2015. Replication and Transmission of the Novel Bovine Influenza D Virus in a  
520 Guinea Pig Model. *Journal of virology* 89:11990-2001.
- 521 27. Oliva J, Mettier J, Sedano L, Delverdier M, Bourges-Abella N, Hause B, Loupias J, Pardo I, Bleuart C,  
522 Bordignon PJ, Meunier E, Le Goffic R, Meyer G, Ducatez MF. 2019. A murine model for the study of  
523 influenza D virus. *J Virol* doi:10.1128/JVI.01662-19.

- 524 28. Pomorska-Mol M, Markowska-Daniel I, Kwit K, Czyzewska E, Dors A, Rachubik J, Pejsak Z. 2014.  
525 Immune and inflammatory response in pigs during acute influenza caused by H1N1 swine influenza virus.  
526 Arch Virol 159:2605-14.
- 527 29. Tavares LP, Teixeira MM, Garcia CC. 2017. The inflammatory response triggered by Influenza virus: a  
528 two edged sword. Inflamm Res 66:283-302.
- 529 30. Sun H, Pu J, Hu J, Liu L, Xu G, Gao GF, Liu X, Liu J. 2016. Characterization of clade 2.3.4.4 highly  
530 pathogenic H5 avian influenza viruses in ducks and chickens. Vet Microbiol 182:116-22.
- 531 31. Uprasertkul M, Kitphati R, Puthavathana P, Kriwong R, Kongchanagul A, Ungchusak K, Angkasekwinai  
532 S, Chokephaibulkit K, Srisook K, Vanprapar N, Auewarakul P. 2007. Apoptosis and pathogenesis of  
533 avian influenza A (H5N1) virus in humans. Emerg Infect Dis 13:708-12.
- 534 32. Fujikura D, Miyazaki T. 2018. Programmed Cell Death in the Pathogenesis of Influenza. Int J Mol Sci 19.
- 535 33. Wurzer WJ, Planz O, Ehrhardt C, Giner M, Silberzahn T, Pleschka S, Ludwig S. 2003. Caspase 3  
536 activation is essential for efficient influenza virus propagation. Embo j 22:2717-28.
- 537 34. Kumar N, Sharma S, Barua S, Tripathi BN, Rouse BT. 2018. Virological and Immunological Outcomes  
538 of Coinfections. Clin Microbiol Rev 31.
- 539 35. DaPalma T, Doonan BP, Trager NM, Kasman LM. 2010. A systematic approach to virus-virus  
540 interactions. Virus Res 149:1-9.
- 541 36. Laurie KL, Guarnaccia TA, Carolan LA, Yan AW, Aban M, Petrie S, Cao P, Heffernan JM, McVernon J,  
542 Mosse J, Kelso A, McCaw JM, Barr IG. 2015. Interval Between Infections and Viral Hierarchy Are  
543 Determinants of Viral Interference Following Influenza Virus Infection in a Ferret Model. J Infect Dis  
544 212:1701-10.
- 545 37. Delgado-Ortega M, Melo S, Punyadarsaniya D, Rame C, Olivier M, Soubieux D, Marc D, Simon G,  
546 Herrler G, Berri M, Dupont J, Meurens F. 2014. Innate immune response to a H3N2 subtype swine  
547 influenza virus in newborn porcine trachea cells, alveolar macrophages, and precision-cut lung slices. Vet  
548 Res 45:42.
- 549 38. Elmore S. 2007. Apoptosis: a review of programmed cell death. Toxicol Pathol 35:495-516.

- 550 39. Kerr JF, Wyllie AH, Currie AR. 1972. Apoptosis: a basic biological phenomenon with wide-ranging  
551 implications in tissue kinetics. *Br J Cancer* 26:239-57.
- 552 40. Fink SL, Cookson BT. 2005. Apoptosis, pyroptosis, and necrosis: mechanistic description of dead and  
553 dying eukaryotic cells. *Infect Immun* 73:1907-16.
- 554 41. Samali A, Zhivotovsky B, Jones D, Nagata S, Orrenius S. 1999. Apoptosis: cell death defined by caspase  
555 activation. *Cell Death Differ* 6:495-6.
- 556 42. Nainu F, Shiratsuchi A, Nakanishi Y. 2017. Induction of Apoptosis and Subsequent Phagocytosis of  
557 Virus-Infected Cells As an Antiviral Mechanism. *Frontiers in Immunology* 8.
- 558 43. Fujimoto I, Pan J, Takizawa T, Nakanishi Y. 2000. Virus Clearance through Apoptosis-Dependent  
559 Phagocytosis of Influenza A Virus-Infected Cells by Macrophages. *Journal of Virology* 74:3399.
- 560 44. Ferguson L, Eckard L, Epperson WB, Long LP, Smith D, Huston C, Genova S, Webby R, Wan XF. 2015.  
561 Influenza D virus infection in Mississippi beef cattle. *Virology* 486:28-34.
- 562 45. Feng Z, Baroch JA, Long LP, Xu Y, Cunningham FL, Pedersen K, Lutman MW, Schmit BS, Bowman  
563 AS, Deliberto TJ, Wan XF. 2014. Influenza A subtype H3 viruses in feral swine, United States, 2011-  
564 2012. *Emerg Infect Dis* 20:843-6.
- 565 46. Martin BE, Sun H, Carrel M, Cunningham FL, Baroch JA, Hanson-Dorr KC, Young SG, Schmit B,  
566 Nolting JM, Yoon KJ, Lutman MW, Pedersen K, Lager K, Bowman AS, Slemons RD, Smith DR,  
567 DeLiberto T, Wan XF. 2017. Feral Swine in the United States Have Been Exposed to both Avian and  
568 Swine Influenza A Viruses. *Appl Environ Microbiol* 83.
- 569 47. Hall JS, Minnis RB, Campbell TA, Barras S, Deyoung RW, Pabilonia K, Avery ML, Sullivan H, Clark L,  
570 McLean RG. 2008. Influenza exposure in United States feral swine populations. *J Wildl Dis* 44:362-8.
- 571 48. Webby RJ, Swenson SL, Krauss SL, Gerrish PJ, Goyal SM, Webster RG. 2000. Evolution of swine H3N2  
572 influenza viruses in the United States. *J Virol* 74:8243-51.
- 573 49. Zhang X, Sun H, Cunningham FL, Li L, Hanson-Dorr K, Hopken MW, Cooley J, Long LP, Baroch JA,  
574 Li T, Schmit BS, Lin X, Olivier AK, Jarman RG, DeLiberto TJ, Wan XF. 2018. Tissue tropisms opt for



- 575 transmissible reassortants during avian and swine influenza A virus co-infection in swine. PLoS Pathog  
576 14:e1007417.
- 577 50. Organization WH. 2017. WHO information for the molecular detection of influenza viruses.  
578 [https://www.who.int/influenza/gisrs\\_laboratory/WHO\\_information\\_for\\_the\\_molecular\\_detection\\_of\\_infl](https://www.who.int/influenza/gisrs_laboratory/WHO_information_for_the_molecular_detection_of_influenza_viruses_20171023_Final.pdf?ua=1)  
579 [uenza\\_viruses\\_20171023\\_Final.pdf?ua=1](https://www.who.int/influenza/gisrs_laboratory/WHO_information_for_the_molecular_detection_of_influenza_viruses_20171023_Final.pdf?ua=1). Accessed
- 580 51. Hoffmann E, Neumann G, Kawaoka Y, Hobom G, Webster R. 2000. A DNA transfection system for  
581 generation of influenza A virus from eight plasmids. Proceedings of the National Academy of Sciences  
582 97:6108-6113.
- 583 52. Yang G, Li S, Blackmon S, Ye J, Bradley KC, Cooley J, Smith D, Hanson L, Cardona C, Steinhauer DA,  
584 Webby R, Liao M, Wan XF. 2013. Mutation tryptophan to leucine at position 222 of haemagglutinin  
585 could facilitate H3N2 influenza A virus infection in dogs. J Gen Virol 94:2599-608.
- 586 53. De Vleeschauwer A, Atanasova K, Van Borm S, van den Berg T, Rasmussen TB, Uttenthal A, Van Reeth  
587 K. 2009. Comparative pathogenesis of an avian H5N2 and a swine H1N1 influenza virus in pigs. PLoS  
588 One 4:e6662.
- 589  
590  
591

592

**Table 1.** Primers used to quantify mRNA expression of proinflammatory markers in STEC.

| Gene           | Forward primer (5'-3')      | Reverse primer (5'-3')     |
|----------------|-----------------------------|----------------------------|
| $\beta$ -actin | GACATCCGCAAGGACCTCTA        | ACACGGAGTACTTGCGCTCT       |
| IP-10          | GTCGAAGGCCATCAAGAATTTAC     | GGCAGAGGTAGATTCTCTCCG      |
| CXCL9          | GAGGAATGGACGTTGTTCTGC       | GGGTTTAGACATGTTTGATCCCC    |
| TNF- $\alpha$  | TGCCTACTGCACTTCGAGGTTATC    | GTGGGCGACGGGCTTATCTG       |
| IFN- $\beta$   | AGTTGCCTGGGACTCCTCAA        | CCTCAGGGACCTCAAAGTTCAT     |
| IFN- $\gamma$  | CGATCCTAAAGGACTATTTTAATGCAA | TTTTGTCACTCTCCTCTTTCCAAT   |
| DDX58          | CGATGAGGTGCAGCATATTCAGGC    | GGAAGTGGAGAAAAAGTGATGCAGCC |
| CCL5           | CCCCATATGCCTCGGACACCACA     | GTTGGCACACACCTGGCGGTTC     |
| IL-1 $\beta$   | AATTCGAGTCTGCCCTGTACCC      | GCCAAGATATAACCGACTTCACCA   |
| IL-4           | GGACACAAGTGCGACATCA         | GCACGTGTGGTGTCTGTA         |
| IL-6           | TGGCTACTGCCTTCCCTACC        | CAGAGATTTTGCCGAGGATG       |
| IL-8           | TTCGATGCCAGTGCATAAATA       | CTGTACAACCTTCTGCACCCA      |
| IL-10          | AGCCAGCATTAAAGTCTGAGAA      | CCTCTCTTGGAGCTTGCTAA       |

593

594

595

596

597

598 **FIGURE LEGENDS**

599

600 **Fig 1. Proinflammatory responses stimulated by IAV and IDV at swine tracheal epithelial primary cells**  
601 (STEC). Proinflammatory responses induced by IAV or IDV alone were showed in black and grey bars,  
602 respectively. A) The relative mRNA expressions were quantified by qPCR, and normalized by  $\beta$ -actin, a house-  
603 keeping gene.  $\Delta\Delta Ct$  (Ct is the cycle threshold) =  $\Delta Ct$  (sample) ( $[Ct_{\text{gene of interest}} - Ct_{\text{housekeeping gene}}]$  of infected cells) -  
604  $\Delta Ct$  (negative) ( $[Ct_{\text{gene of interest}} - Ct_{\text{housekeeping gene}}]$  of uninfected cells). The mean values of fold change ( $2^{-\Delta\Delta Ct}$ ) of  
605 triplicates and standard deviation were represented. B) The protein expression of IFN- $\beta$  were quantified by  
606 ELISA assays. The fold change values of IFN- $\beta$ 's protein level was calculated (infected samples/negative samples)  
607 and plotted as y axis. hpi, hours post inoculation.

608

609 **Fig 2. Growth kinetics of coinfecting IAV and IDV in STEC.** A) Simultaneous coinfections (A+D); B)  
610 sequential infections of IAV infection followed by IDV (A-D) with a time gap of 6 (A-D-6h), 24 (A-D-24h) or 48  
611 (A-D-48h) hours; C) sequential infections of IDV infection followed by IAV with a time gap of 6 (D-A-6h), 24  
612 (D-A-24h) or 48 (D-A-48h) hours. Growth kinetics assays were performed in STEC at 37°C in triplicates with a  
613 MOI of 0.001 of IAV and 0.1 of IDV, respectively. At each time point, supernatant was collected and replaced,  
614 and RNA copy numbers was determined by qRT-PCR. The left panel of each subfigure showed the detection of  
615 IAV whereas the right panel showed the detection of IDV. The x axis of left panel in each subfigure represents  
616 hours post IAV infection whereas the right panel represents hours post IDV infection of the corresponding  
617 samples. The mean copy numbers and standard deviation were calculated for each experimental replicate at each  
618 time, and the dotted line denoted the detecting limit of 1. One-way repeated measures ANOVA were performed to  
619 compare between the single infection and coinfection groups, and significant differences were presented ( $*p \leq 0.05$ ,  
620  $**p < 0.0021$ ,  $***p < 0.0002$ ,  $****p < 0.0001$ ) and not significant ( $p > 0.05$ ) differences as ns.

621

622 **Fig 3. Viral shedding in the pigs from the IAV and IDV coinfection experiment.** A) Viral titers of IAV; B)  
623 Viral titers of IDV. Viral loads in each nasal wash were quantified by qRT-PCR and represented as  $\log_{10}$  (RNA  
624 copies)/ml. Each bar represents the mean values per group and standard deviation. Each data point indicated one  
625 sample. The dashed line indicates the limit of detection of  $3.48 \log_{10}$  copies/ml. Samples from different treatment  
626 groups are differentiated in colors: A-mock group in red, D-mock group in blue and A+D group in black. No IAV  
627 was detected in the negative group and D-mock group. No IDV was detected in the negative group and A-mock  
628 group (not shown). Two-way ANOVA analysis was performed to compare between the single infection and  
629 coinfection groups, and significant differences were presented ( $*p \leq 0.05$ ,  $**p < 0.0021$ ,  $***p < 0.0002$ ,  
630  $****p < 0.0001$ ) and not significant ( $p > 0.05$ ) differences as ns.

631  
632 **Fig 4. Viral titers in the respiratory tract tissues of the pigs from the IAV and IDV coinfection experiment.**  
633 A) Viral titers of IAV; B) Viral titers of IDV. Viral loads were quantified by qRT-PCR and represented as  $\log_{10}$   
634 (RNA copies)/g. Each bar represents the mean values per group and standard deviation. Each data point indicated  
635 one sample. The dashed line indicates the limit of detection of  $4.03 \log_{10}$  copies/g. Samples from different  
636 treatment groups are differentiated in colors: A-mock group in red, D-mock group in blue and A+D group in  
637 black. No IAV was detected in the negative group and D-mock group. No IDV was detected in the negative group  
638 and A-mock group (not shown). Two-way ANOVA analysis was performed to compare between the single  
639 infection and coinfection groups, and significant differences were presented ( $*p \leq 0.05$ ,  $**p < 0.0021$ ,  $***p < 0.0002$ ,  
640  $****p < 0.0001$ ) and not significant ( $p > 0.05$ ) differences as ns. Abbreviations: rostral turbinate (RT), middle  
641 turbinate (MT), ethmoid turbinate (ET), soft palate (SP), upper trachea (TR-U), middle trachea (TR-M), distal  
642 trachea (TR-D), bronchus (BR), left cranial lung (LCR), left caudal lung (LCD), right cranial lung (RCR), right  
643 caudal lung (RCD), right middle lung (RM) and right accessory lung (RA).

644 **Fig 5. Hematoxylin and eosin stain staining of tracheas of pigs.** A) Negative control, in which pigs were  
645 inoculated with sterile PBS; B) D-mock, in which pigs were inoculated with D/46N alone; C) A-mock, in which

646 pigs were inoculated with sH3N2 alone; D) A+D, in which pigs were inoculated simultaneously with D/46N and  
647 sH3N2; and E) Cleaved caspase 3 staining in the trachea of pigs. All tracheal tissues showed chronic  
648 lymphoplasmacytic inflammation within the mucosa and submucosa. Apoptotic bodies (arrows) were frequently  
649 observed (5D, arrows), however no significantly different between treatment groups and varied between pigs  
650 (5E).

651

# Figure 1

## A

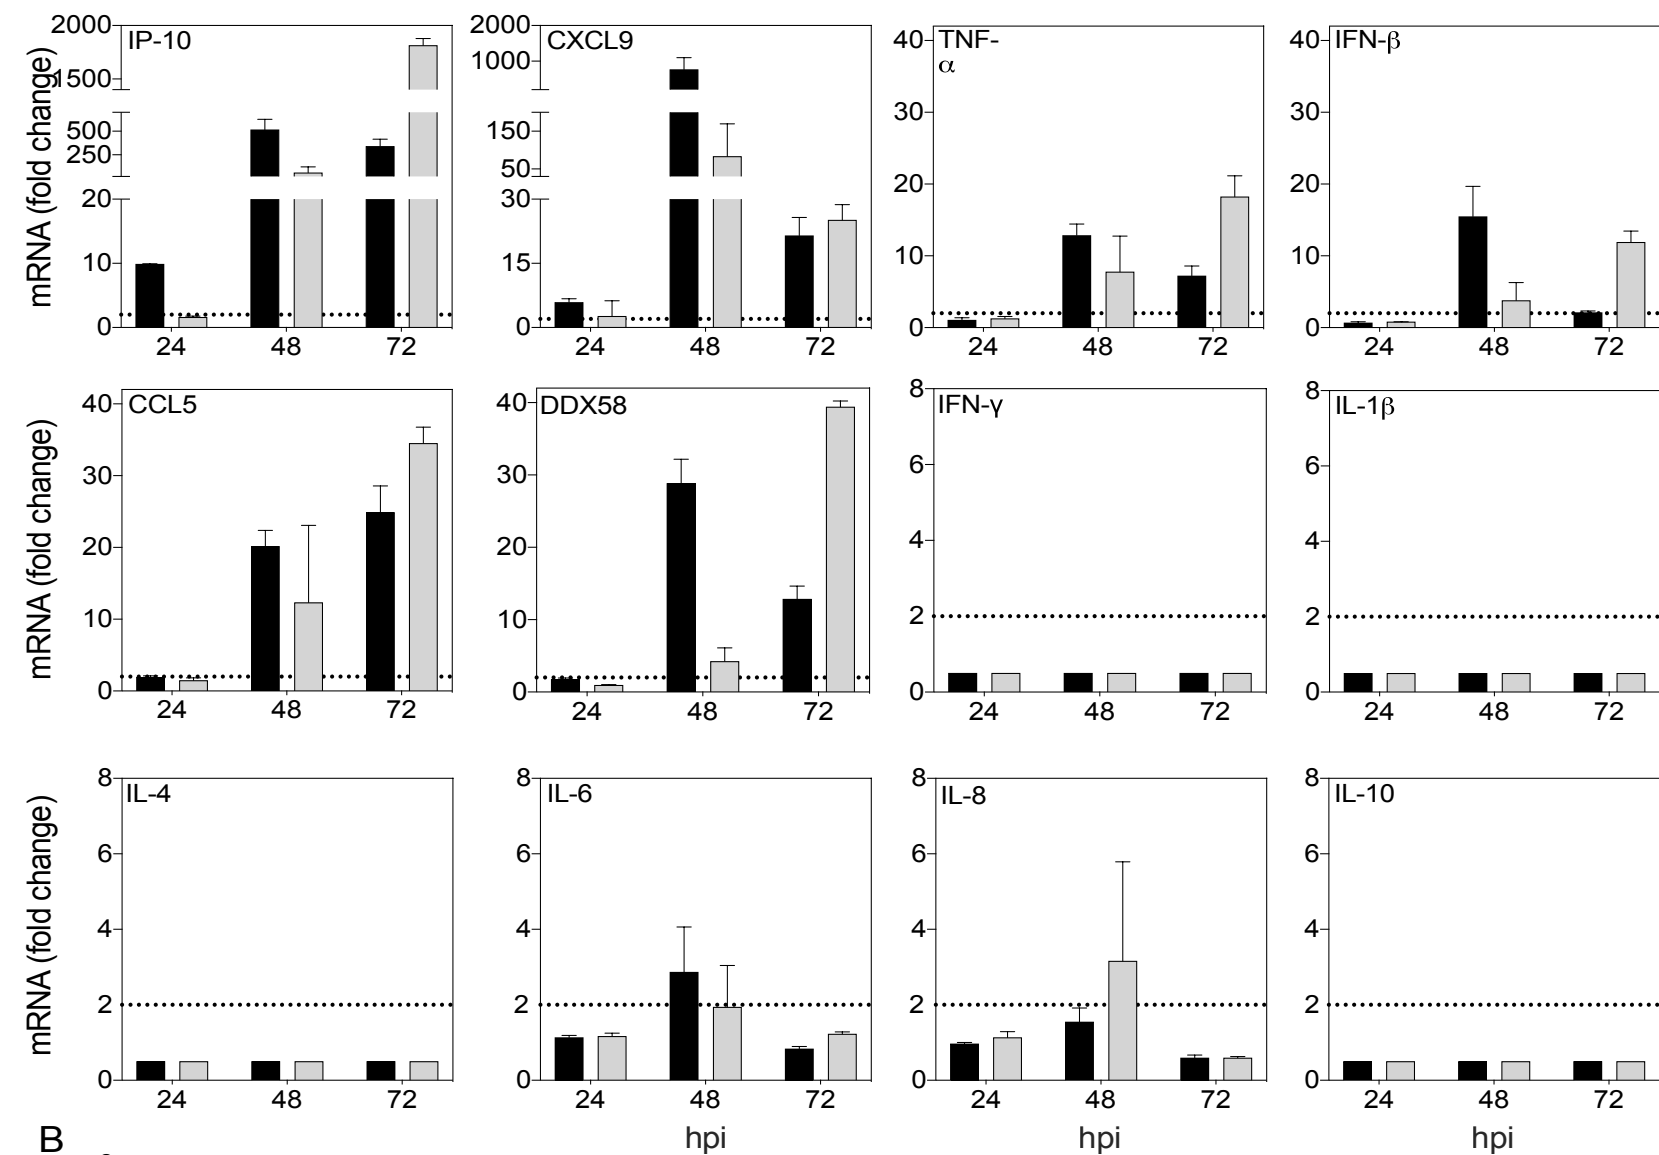

## B

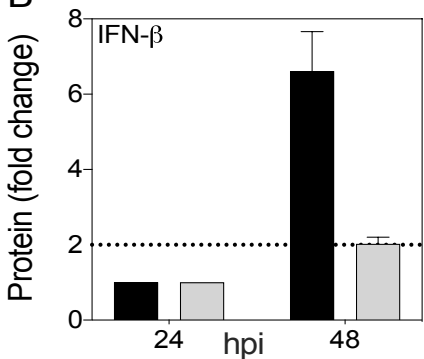

IAV  
 IDV

Figure 2

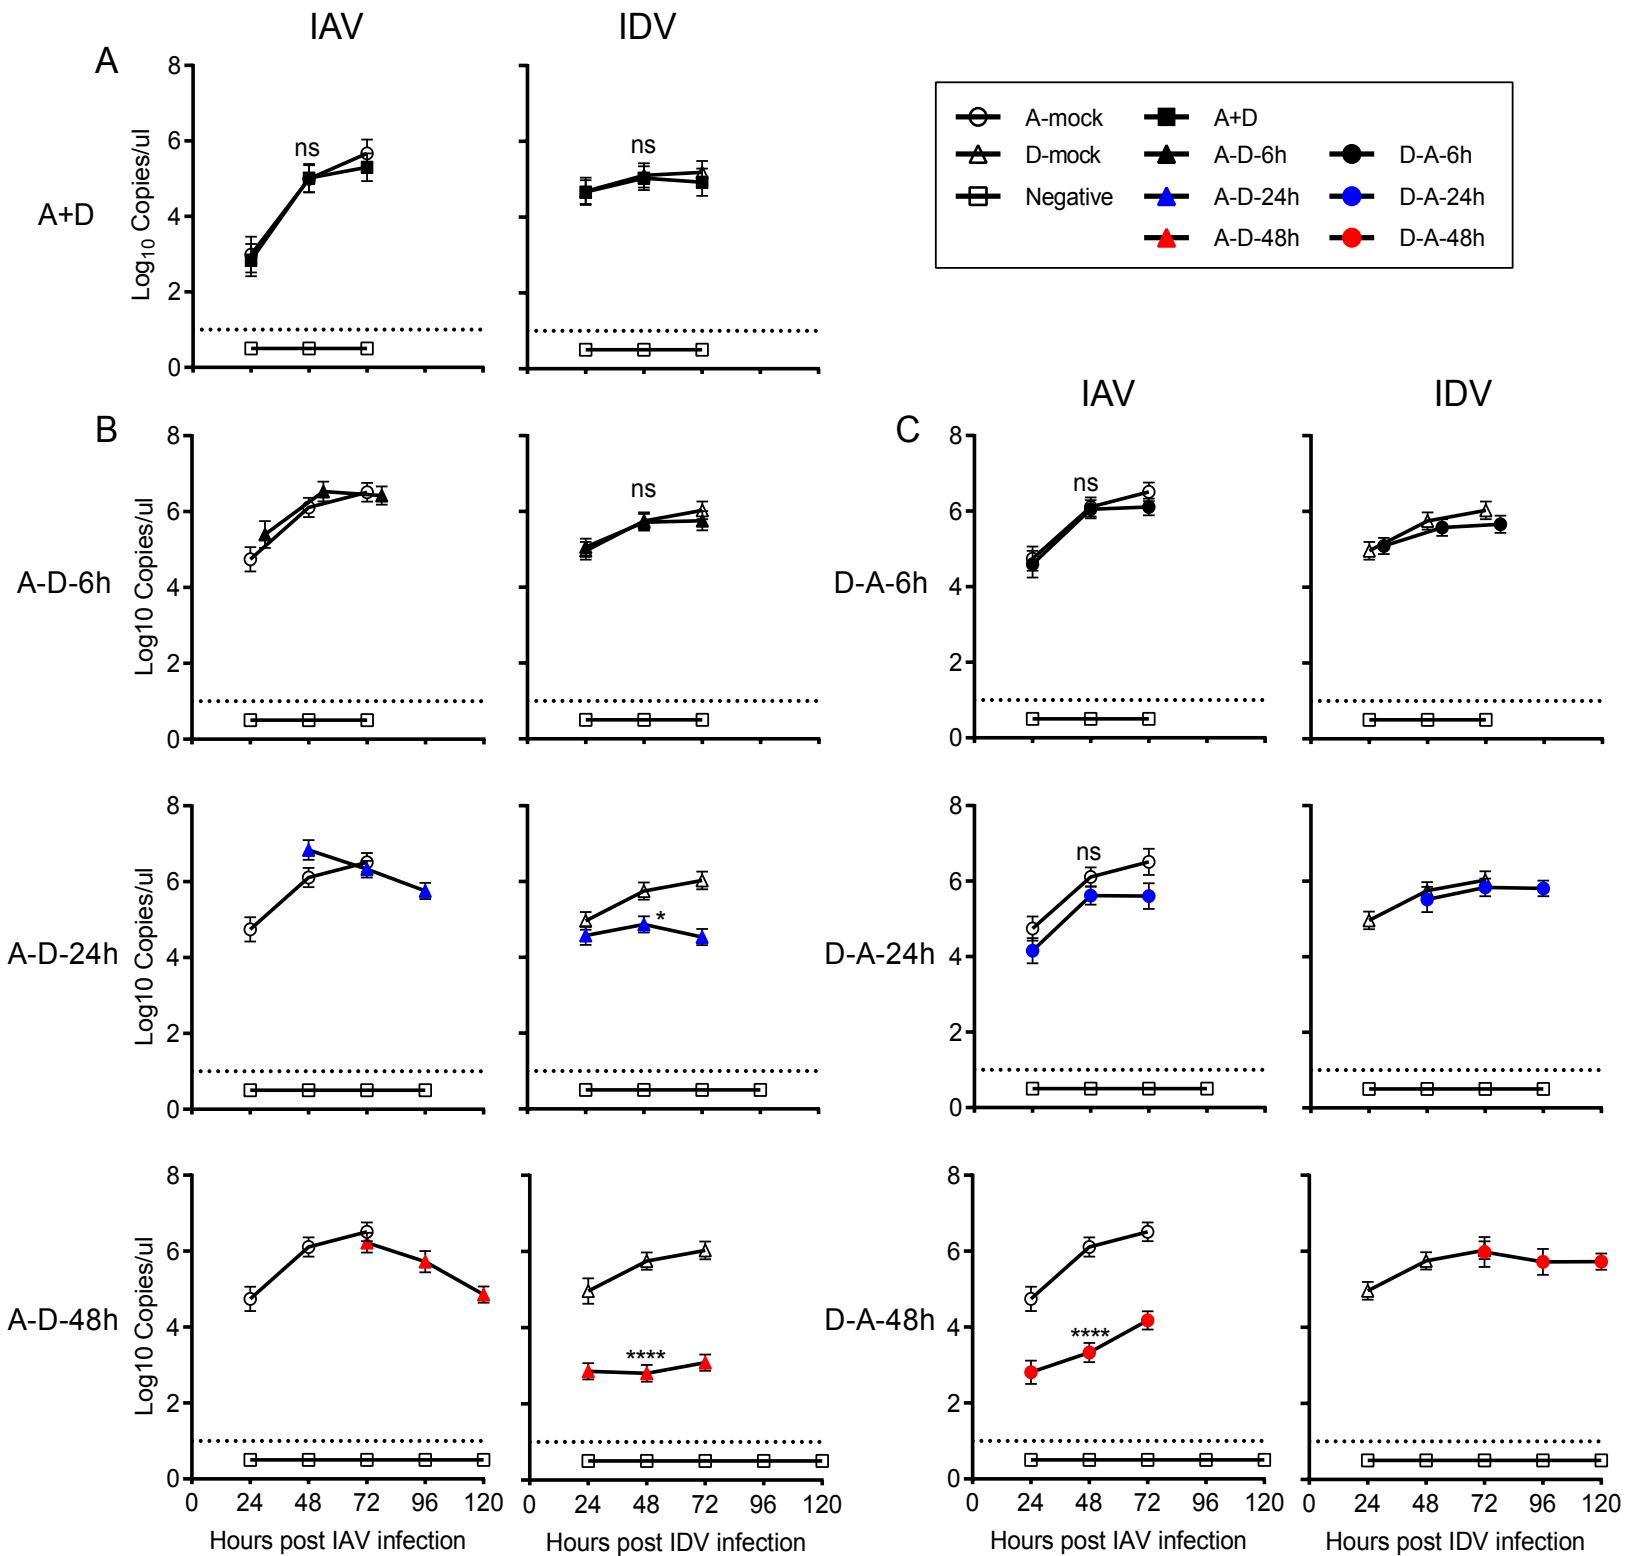

Figure 3

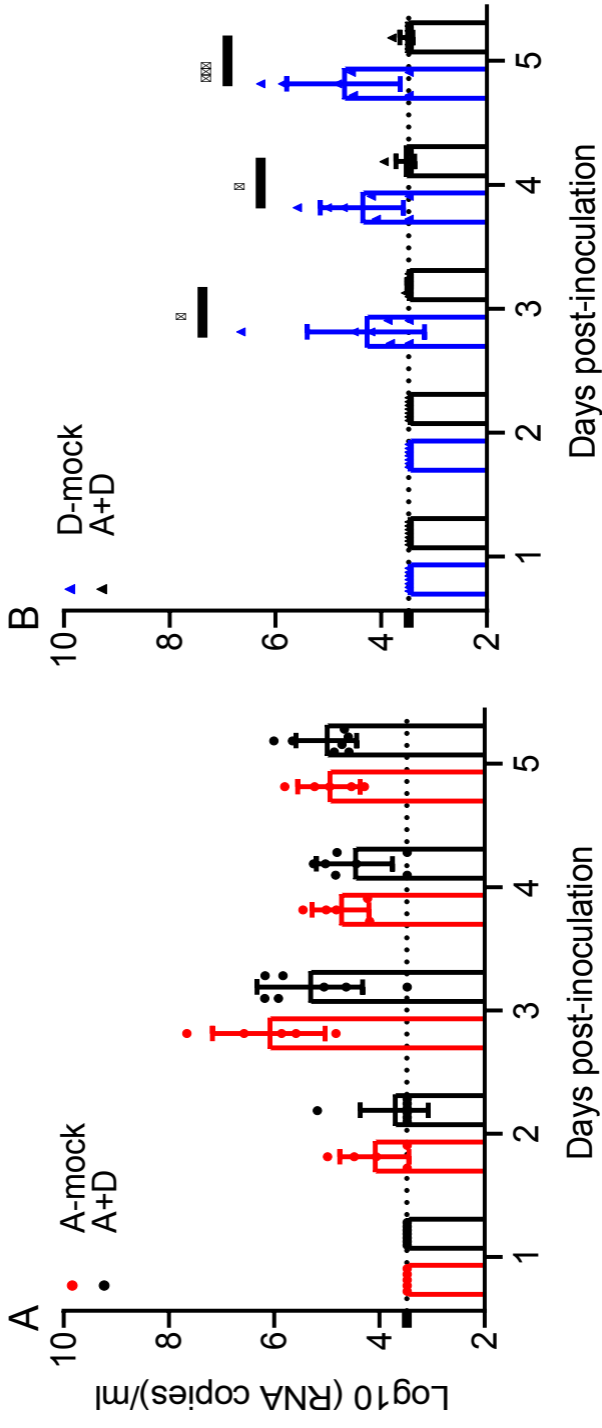



Figure 4

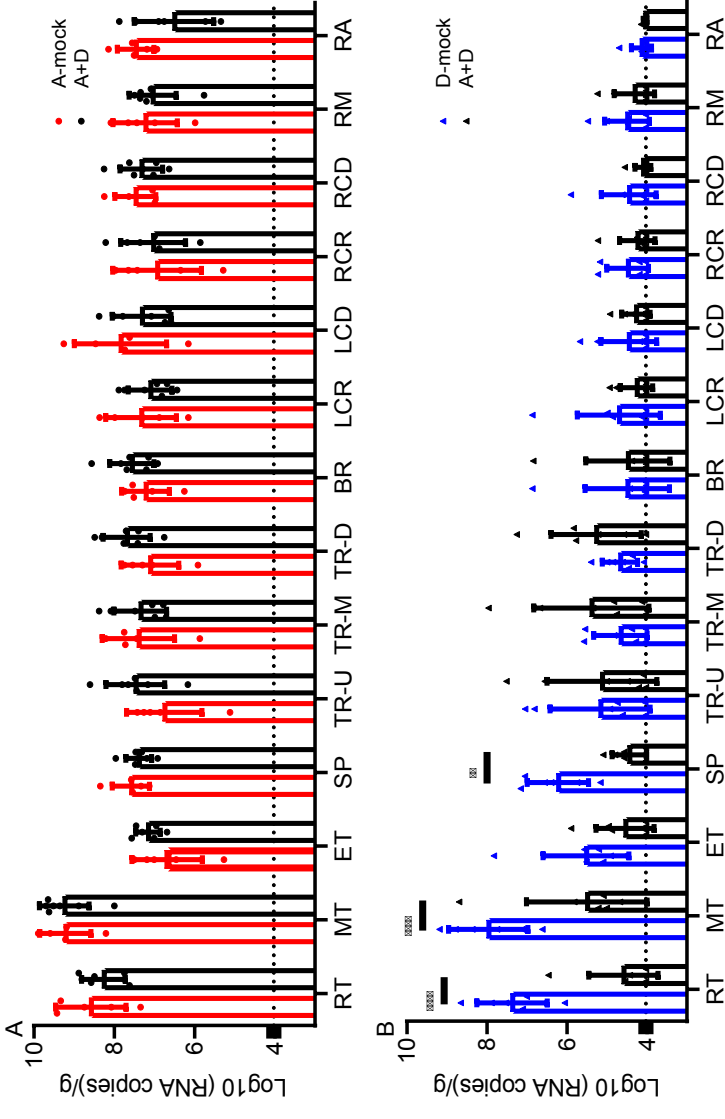

Figure 5

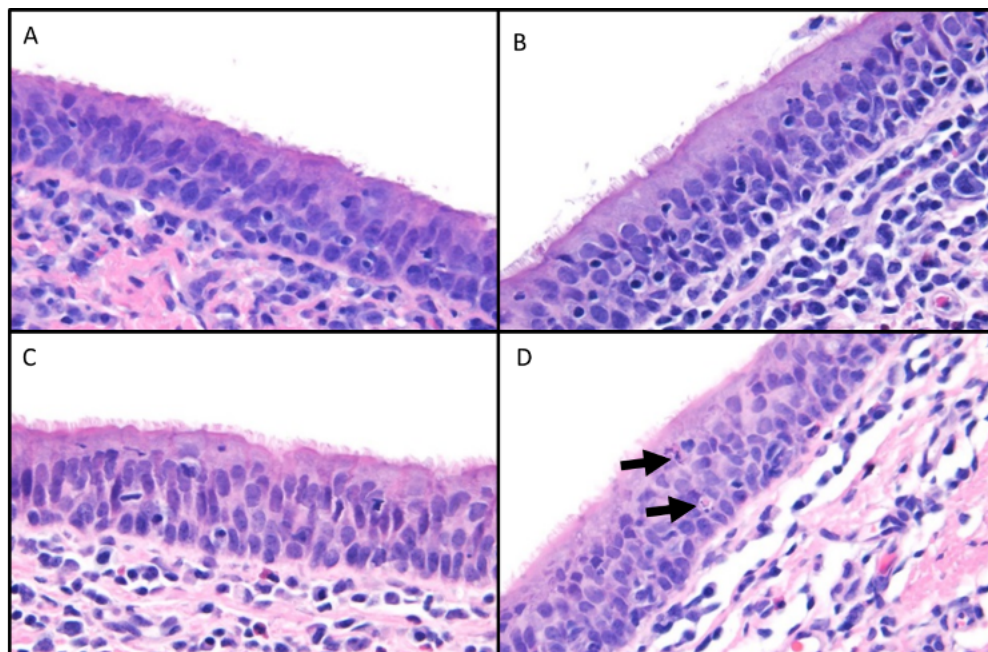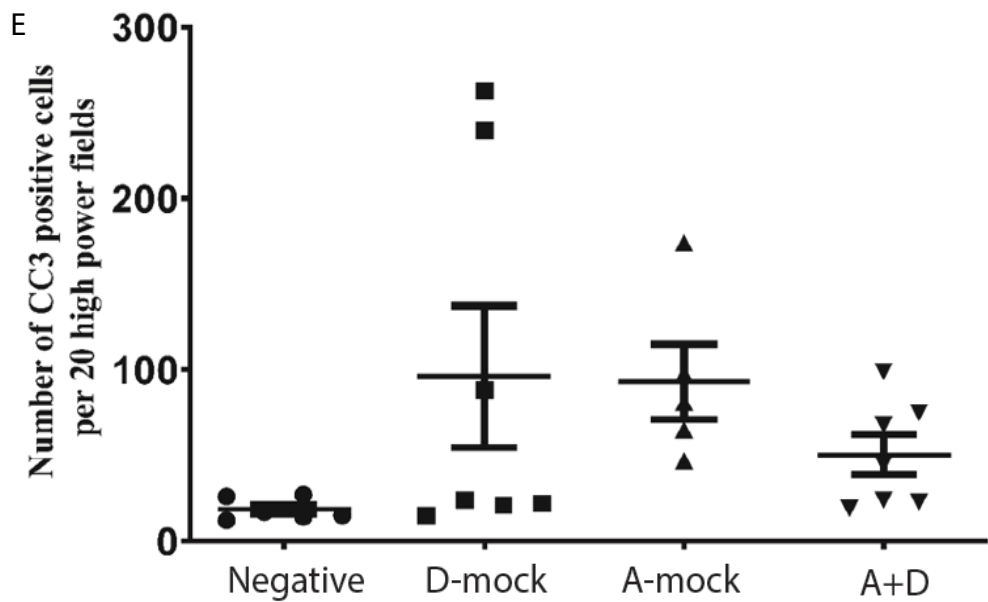

Source: https://biorxiv.org/content/10.1101/2021.03.14.435363v1.full.pdf
